# Supplementary material
Source: Springer Nature journal article supplement (https://www.springermedizin.de/resource/supplementary/13002_2013_342_MOESM4_ESM.pdf/9627662)
Supplement: MOESM4 [file 9627662]

|                                                                                      |                                                                                          |                                                                                   |
|--------------------------------------------------------------------------------------|------------------------------------------------------------------------------------------|-----------------------------------------------------------------------------------|
| <p>a) Ecological variance<br/>Explained by Matrix <b>X</b></p> $a = (a+b+c) - (b+c)$ | <p>c) Socio-cultural variance<br/>Explained by Matrix <b>X</b></p> $c = (a+b+c) - (b+c)$ | <p>d) Unexplained variance<br/>Explained by Matrix <b>X</b></p> $d = 1 - (a+b+c)$ |
|--------------------------------------------------------------------------------------|------------------------------------------------------------------------------------------|-----------------------------------------------------------------------------------|

Management intensity of edible plant species Matrix **Y**

|                                                                                        |
|----------------------------------------------------------------------------------------|
| <p>b) Intersection of the ecological and socio-cultural components</p> $b = (a+b) - a$ |
|----------------------------------------------------------------------------------------|
